# Supplementary material for: Soybean Thrips (Thysanoptera: Thripidae) Harbor Highly Diverse Populations of Arthropod, Fungal and Plant Viruses
Source: PubMed Central journal article supplement (PMC7761488; doi:10.3390/v12121376), 2020-12-01
Supplement: viruses-12-01376-s001.pdf [file viruses-12-01376-s001.pdf]

**Supplementary Table 1.** Virus-like sequences assembled from soybean thrips RNA-seq data

| Sequence Name                                  | Accession Number | Longest Contig | Number of Reads      | Percent Coverage | Mean Coverage Depth | Best Match (Accession Number)                              | Percent aa Identity |
|------------------------------------------------|------------------|----------------|----------------------|------------------|---------------------|------------------------------------------------------------|---------------------|
| <b>Positive-sense RNA viruses</b>              |                  |                |                      |                  |                     |                                                            |                     |
| <b>Order: Picornavirales</b>                   |                  |                |                      |                  |                     |                                                            |                     |
| <b>Iflavirus-like</b>                          |                  |                |                      |                  |                     |                                                            |                     |
| *Hubei arthropod virus 1                       | MT293153         | 9635           | 834,888              | 100%             | 19,443              | Hubei arthropod virus 1 (YP_009336629.1)                   | 96.5%               |
| Soybean thrips iflavirus 1                     | MT195546         | 10806          | 79,433               | 100%             | 1,742               | Hubei picorna-like virus 32 (YP_009337306.1)               | 48.7%               |
| Soybean thrips iflavirus 2                     | MT195547         | 10286          | 2.34×10 <sup>6</sup> | 100%             | 38,908              | Ixodes scapularis iflavirus (BBD75427.1)                   | 24.9%               |
| Soybean thrips iflavirus 3                     | MT195548         | 10256          | 60,991               | 100%             | 1,425               | Hubei picorna-like virus 28 (YP_009337284.1)               | 45.4%               |
| Soybean thrips iflavirus 4                     | MT224138         | 10073          | 13,905               | 100%             | 327                 | La Jolla virus (AKH40286.1)                                | 36.2%               |
| Soybean thrips iflavirus 5                     | MT224139         | 9900           | 66,312               | 99%              | 1,586               | Vespa velutina associated ifla-like virus (QGL51726.1)     | 51.5%               |
| Soybean thrips iflavirus 6                     | MT224140         | 9488           | 6,855                | 96%              | 164                 | Pityohyphantes rubrofasciatus iflavirus (YP_009351892.1)   | 37.0%               |
| Soybean thrips iflavirus 7                     | MW023868         | 8951           | 49,369               | 100%             | 1,143               | Sacbrood virus (AJA38041.1)                                | 28.1%               |
| Soybean thrips iflavirus 8                     | MT240781         | 8886           | 743,592              | 99%              | 19,994              | Hubei picorna-like virus 41 (YP_009337750.1)               | 51.4%               |
| Soybean thrips iflavirus 9                     | MT224141         | 8391           | 49,369               | 92%              | 28                  | Darwin bee virus 2 (AWK77843.1)                            | 42.8%               |
| Soybean thrips ifla-like virus 10              | MT224142         | 7343           | 2,852                | 80%              | 74                  | Darwin bee virus 2 (AWK77843.1)                            | 70.1%               |
| Soybean thrips iflavirus 11                    | MW039357         | 1381           | 117                  | 16%              | 3                   | Harmonia axyridis virus 1 (QFR15912.1)                     | 51.6%               |
| Soybean thrips picorna-like virus 5            | MW039359         | 1425           | 102                  | 14%              | 2                   | Spodoptera exigua iflavirus 1 (YP_004935363.1)             | 42.0%               |
| <b>Dicistrovirus-like</b>                      |                  |                |                      |                  |                     |                                                            |                     |
| Soybean thrips dicistrovirus 1                 | MT195550         | 10079          | 4,541                | 100%             | 106                 | Hubei picorna-like virus 14 (YP_009337313.1)               | 61.6%               |
| Soybean thrips dicistrovirus 2                 | MT224137         | 9847           | 16,016               | 100%             | 363                 | Griffin dicistrovirus (AOC55056.1)                         | 28.5%               |
| Soybean thrips picorna-like virus 1            | MT240797         | 8658           | 1,997                | 100%             | 55                  | Pteromalus puparum small RNA-containing virus (ACG60668.1) | 65.3%               |
| Soybean thrips picorna-like virus 3            | MT240798         | 5849           | 800                  | 59%              | 19                  | Wuhan arthropod virus 2 (YP_009342286.1)                   | 44.5%               |
| Soybean thrips picorna-like virus 4            | MT240799         | 4035           | 397                  | 38%              | 9                   | Myrmica scabrinodis virus 2 (AYW51544.1)                   | 59.8%               |
| Soybean thrips picorna-like virus 10           | MW023863         | 6896           | 28,677               | 100%             | 959                 | Melipona quadrifasciata virus (QCE20587.1)                 | 39.4%               |
| *Aphid lethal paralysis virus                  | MT240796         | 9883           | 89,940               | 100%             | 2,166               | Aphid lethal paralysis virus (AGF84786.1)                  | 98.9%               |
| *Rhopalosiphum padi virus                      | MW039360         | 1848           | 297                  | 38%              | 1                   | Rhopalosiphum padi virus (AWM98375.1)                      | 96.9%               |
| *Rhopalosiphum padi virus                      | MW039361         | 1779           | 244                  | 18%              | 4                   | Rhopalosiphum padi virus (AWM98375.1)                      | 88.3%               |
| <b>Calicivirus-like</b>                        |                  |                |                      |                  |                     |                                                            |                     |
| *Soybean thrips Pernambuco virus               | MT293133         | 5160           | 726                  | 100%             | 32                  | Pernambuco virus (QCP68850.1)                              | 95.3%               |
| <b>Other Picornavirus-like</b>                 |                  |                |                      |                  |                     |                                                            |                     |
| Soybean thrips picorna-like virus 2            | MW039358         | 1828           | 136                  | 31%              | 5                   | Insect-associated waikavirus 1 (QHB15178.1)                | 36.2%               |
| Soybean thrips picorna-like virus 6            | MT293127         | 3335           | 180                  | 84%              | 11                  | Volivirus sp. (APO40851.1)                                 | 65.8%               |
| Soybean thrips picorna-like virus 7            | MT293128         | 8960           | 4,385                | 97%              | 114                 | Perth bee virus 3 (AWK77896.1)                             | 62.6%               |
| Soybean thrips picorna-like virus 8            | MT293129         | 4220           | 2,156                | 41%              | 7                   | Lampyrus noctiluca iflavirus 1 (QBP37019.1)                | 35.0%               |
| Soybean thrips picorna-like virus 9            | MT293152         | 3007           | 13,400               | 33%              | 8                   | Thika virus (YP_009140561.1)                               | 50.8%               |
| Soybean thrips picorna-like virus 11           | MW023864         | 6617           | 47,002               | 79%              | 1,304               | Solenopsis invicta virus 13 (QBL75905.1)                   | 30.0%               |
| <b>Bicistronic Picornavirus-like</b>           |                  |                |                      |                  |                     |                                                            |                     |
| Soybean thrips bicistronic virus 1             | MT195549         | 8654           | 12,928               | 97%              | 351                 | Hubei picorna-like virus 51 (YP_009337724.1)               | 50.4%               |
| *Hubei picorna-like virus 55                   | MT293126         | 9802           | 16,146               | 100%             | 379                 | Hubei picorna-like virus 55 (YP_009337269.1)               | 99.0%               |
| <b>Order: Sobelivirales (Sobemovirus-like)</b> |                  |                |                      |                  |                     |                                                            |                     |
| Soybean thrips sobemo-like virus 1             | MT293131         | 3592           | 10,363               | 100%             | 645                 | Hubei tetragnatha maxillosa virus 6 (YP_009330269.1)       | 32.1%               |
| Soybean thrips sobemo-like virus 2             | MT293132         | 3272           | 639                  | 100%             | 45                  | Wenzhou sobemo-like virus 2 (YP_009337335.1)               | 40.6%               |
| Soybean thrips sobemo-like virus 3             | MW023865         | 2734           | 2,983                | 100%             | 250                 | Mlepnos solemo-like virus (QIJ70120.1)                     | 32.8%               |
| Soybean thrips sobemo-like virus 4             | MW023866         | 3407           | 116,224              | 100%             | 7,759               | Hubei sobemo-like virus 25 (YP_009330120.1)                | 67.6%               |
| Soybean thrips sobemo-like virus 5             | MW023867         | 3401           | 14,787               | 99%              | 983                 | Hubei sobemo-like virus 35 (YP_009330090.1)                | 61.4%               |
| Soybean thrips sobemo-like virus 6             | MW039352         | 2744           | 3,701                | 96%              | 289                 | Wuhan house centipede virus 4 (YP_009342451.1)             | 31.0%               |

|                                                 |          |       |         |      |        |                                                                  |       |
|-------------------------------------------------|----------|-------|---------|------|--------|------------------------------------------------------------------|-------|
| Soybean thrips sobemo-like virus 7              | MW039353 | 2704  | 5,908   | 93%  | 429    | Wuhan arthropod virus 4 (YP_009342307.1)                         | 54.0% |
| Soybean thrips sobemo-like virus 8              | MW039354 | 2671  | 2,233   | 100% | 195    | Hubei sobemo-like virus 7 (YP_009330005.1)                       | 42.5% |
| Soybean thrips sobemo-like virus 9              | MW039355 | 2431  | 141     | 87%  | 12     | Hubei sobemo-like virus 9 (YP_009329983.1)                       | 62.8% |
| Soybean thrips sobemo-like virus 10             | MW023863 | 3085  | 11,214  | 100% | 830    | Hubei sobemo-like virus 42 (YP_009330107.1)                      | 54.5% |
| # Soybean thrips sobemo-like virus 11           | MW023864 | 2639  | 171     | 42%  | 6      | Sesbania mosaic virus (NP_066393.4)                              | 60.0% |
| *# Lucerne transient streak virus               | MT224146 | 4227  | 1,963   | 99%  | 107    | Lucerne transient streak virus (YP_007438849.1)                  | 96.7% |
| <b>Order: Martellivirales (Virgavirus-like)</b> |          |       |         |      |        |                                                                  |       |
| Soybean thrips virga-like virus 1               | MT240784 | 10947 | 14,895  | 94%  | 290    | Beult virus (AWA82276.1)                                         | 31.6% |
| Soybean thrips virga-like virus 2               | MT240785 | 3339  | 169     | 32%  | 4      | Hubei virga-like virus 11 (QIJ70141.1)                           | 62.7% |
| Soybean thrips nege-like virus 1                | MT240782 | 9369  | 73,252  | 97%  | 485    | San Bernardo virus (AQM55436.1)                                  | 45.6% |
| Soybean thrips nege-like virus 2                | MW039375 | 2003  | 73      | 19%  | 2      | Wuhan house centipede virus 1 (YP_009342435.1)                   | 45.1% |
| Soybean thrips nege-like virus 2                | MW039377 | 1289  | 82      | 13%  | 2      | Wuhan house centipede virus 1 (YP_009342435.1)                   | 28.9% |
| #Soybean thrips iivi-like virus 1, RNA1         | MT240787 | 3929  | 2,273   | 95%  | 127    | Grapevine associated jivivirus 2 (QIJ25701.1)                    | 33.9% |
| #Soybean thrips iivi-like virus 1, RNA2         | MW039368 | 3245  | 636     | 100% | 44     | Grapevine associated jivivirus 2 (QIJ25702.1)                    | 55.1% |
| #Soybean thrips iivi-like virus 2, RNA1         | MT240786 | 3733  | 533     | 90%  | 28     | Grapevine associated jivivirus 2 (QIJ25701.1)                    | 44.1% |
| #Soybean thrips iivi-like virus 2, RNA2         | MW039369 | 1756  | 243     | 55%  | 18     | Grapevine associated jivivirus 1 (QIJ25699.1)                    | 65.0% |
| *# Peanut stunt virus, RNA1                     | MT293135 | 3106  | 570     | 93%  | 40     | Peanut stunt virus (NP_049331.1)                                 | 98.5% |
| *# Peanut stunt virus, RNA2                     | MT293136 | 2621  | 262     | 89%  | 21     | Peanut stunt virus (NP_049332.1)                                 | 94.8% |
| *# Peanut stunt virus, RNA3                     | MT293137 | 2026  | 2,141   | 93%  | 231    | Peanut stunt virus (NP_049333.1)                                 | 88.9% |
| *# Turnip vein-clearing virus                   | MT293141 | 3682  | 444     | 58%  | 10     | Turnip vein-clearing virus (NP_046151.1)                         | 97.2% |
| <b>Order: Tolivirales (Tombusvirus-like)</b>    |          |       |         |      |        |                                                                  |       |
| Soybean thrips tombus-like virus 1              | MT240788 | 4172  | 1,393   | 100% | 74     | Sanxia tombus-like virus 5 (YP_009337188.1)                      | 35.3% |
| Soybean thrips tombus-like virus 2              | MT240789 | 4300  | 20,789  | 100% | 1,129  | Sanxia tombus-like virus 5 (YP_009337188.1)                      | 39.9% |
| Soybean thrips tombus-like virus 3              | MT240790 | 4088  | 2,275   | 100% | 127    | Wuhan spider virus 9 (YP_009344999.1)                            | 43.5% |
| Soybean thrips tombus-like virus 4              | MT240791 | 3818  | 5,351   | 94%  | 292    | Hubei tombus-like virus 18 (YP_009336696.1)                      | 41.4% |
| Soybean thrips tombus-like virus 5              | MT240793 | 3783  | 4,638   | 100% | 263    | Wuhan spider virus 9 (AOC55070.1)                                | 40.7% |
| # Soybean thrips tombus-like virus 6            | MT240794 | 3399  | 687     | 84%  | 36     | Japanese iris necrotic ring virus (AFL55711.1)                   | 39.0% |
| Soybean thrips tombus-like virus 7              | MW023842 | 2823  | 394     | 60%  | 19     | Vespa velutina associated permutotetra-like virus 2 (QGL51737.1) | 30.2% |
| Soybean thrips tombus-like virus 8              | MW023843 | 2325  | 373     | 57%  | 21     | Wuhan spider virus 9 (YP_009344999.1)                            | 37.2% |
| Soybean thrips tombus-like virus 9              | MW023844 | 1946  | 140     | 48%  | 8      | Wuhan spider virus 9 (YP_009344999.1)                            | 36.1% |
| Soybean thrips tombus-like virus 10             | MW023845 | 1796  | 307     | 81%  | 32     | Cushing virus (QED21532.1)                                       | 47.7% |
| Soybean thrips tombus-like virus 11             | MW023846 | 1418  | 99      | 26%  | 4      | Hubei tombus-like virus 2 (YP_009336967.1)                       | 74.4% |
| *Wuhan insect virus 21, RNA1                    | MT240792 | 3733  | 3,201   | 100% | 182    | Wuhan insect virus 21 (BBV14765.1)                               | 94.6% |
| *Hubei tombus-like virus 2                      | MW039367 | 1381  | 70      | 25%  | 2      | Hubei tombus-like virus 2 (YP_009336967.1)                       | 99.3% |
| <b>Order: Amarillovirales (Flavivirus-like)</b> |          |       |         |      |        |                                                                  |       |
| Soybean thrips virus 1, segment 1               | MW023851 | 3290  | 9,296   | 100% | 651    | Wuhan flea virus (YP_009179403.1)                                | 45.5% |
| Soybean thrips virus 1, segment 3               | MW023852 | 2631  | 7,605   | 92%  | 614    | Wuhan flea virus (YP_009179404.1)                                | 39.1% |
| Soybean thrips virus 1, segment 4               | MW023853 | 2730  | 21,324  | 96%  | 1,720  | Wuhan flea virus (YP_009179399.1)                                | 23.7% |
| Soybean thrips virus 2, segment 1               | MW023854 | 3096  | 2,257   | 100% | 164    | Wuhan aphid virus 2 (YP_009179378.1)                             | 44.0% |
| Soybean thrips virus 2, segment 2               | MW023855 | 2131  | 7,423   | 98%  | 777    | Wuhan aphid virus 2 (YP_009179385.1)                             | 25.4% |
| Soybean thrips virus 2, segment 3               | MW023856 | 3071  | 271,883 | 100% | 20,058 | Wuhan aphid virus 2 (YP_009179379.1)                             | 32.0% |
| Soybean thrips virus 2, segment 4               | MW023857 | 2819  | 21,952  | 99%  | 1,792  | Wuhan aphid virus 2 (YP_009179387.1)                             | 55.9% |
| Soybean thrips virus 3, segment 1               | MW033628 | 3061  | 17,735  | 100% | 1,355  | Wuhan aphid virus 2 (YP_009179378.1)                             | 75.9% |
| Soybean thrips virus 3, segment 2               | MW033629 | 2120  | 4,832   | 99%  | 516    | Wuhan aphid virus 2 (QDF44110.1)                                 | 54.1% |
| Soybean thrips virus 3, segment 3               | MW033630 | 1814  | 14,470  | 67%  | 1,793  | Wuhan aphid virus 2 (QDF44111.1)                                 | 26.7% |
| Soybean thrips virus 3, segment 4               | MW033631 | 3228  | 23,892  | 100% | 1,881  | Wuhan aphid virus 2 (YP_009179387.1)                             | 24.3% |
| Soybean thrips virus 4, segment 1               | MW033624 | 3279  | 262,587 | 100% | 17,893 | Wuhan aphid virus 1 (YP_009179388.1)                             | 40.8% |

|                                                                     |          |      |         |      |        |                                                                  |       |
|---------------------------------------------------------------------|----------|------|---------|------|--------|------------------------------------------------------------------|-------|
| Soybean thrips virus 4, segment 3                                   | MW033625 | 2804 | 41,928  | 100% | 3,440  | Wuhan aphid virus 2 (YP_009179379.1)                             | 61.8% |
| Soybean thrips virus 4, segment 4                                   | MW033626 | 3002 | 290,376 | 100% | 21,463 | Wuhan aphid virus 2 (YP_009179386.1)                             | 25.2% |
| Soybean thrips virus 5, segment 4                                   | MW033632 | 2699 | 568     | 95%  | 47     | Wuhan aphid virus 2 (YP_009179387.1)                             | 49.4% |
| *Wuhan aphid virus 1, segment 1                                     | MW023847 | 3154 | 8,558   | 100% | 620    | Wuhan aphid virus 1 (YP_009179388.1)                             | 86.1% |
| *Wuhan aphid virus 1, segment 2                                     | MW023848 | 2171 | 1,962   | 100% | 207    | Wuhan aphid virus 1 (YP_009179381.1)                             | 78.9% |
| *Wuhan aphid virus 1, segment 3                                     | MW023849 | 2840 | 2,159   | 100% | 175    | Wuhan aphid virus 1 (YP_009179389.1)                             | 85.4% |
| *Wuhan aphid virus 1, segment 4                                     | MW023850 | 2834 | 15,315  | 100% | 1,270  | Wuhan aphid virus 1 (YP_009179383.1)                             | 79.6% |
| *Shayang fly virus 4                                                | MW039350 | 2101 | 228     | 23%  | 6      | Shayang fly virus 4 (YP_009179225.1)                             | 84.8% |
| <b>Order: Tymovirales (Tymovirus-like)</b>                          |          |      |         |      |        |                                                                  |       |
| *Hubei macula-like virus 3                                          | MT240795 | 6024 | 2,649   | 100% | 64     | Hubei macula-like virus 3 (APG77727.1)                           | 93.0% |
| # Soybean carlavirus 1                                              | MT293130 | 8631 | 3,212   | 100% | 87     | Red clover carlavirus A (AUF71590.1)                             | 62.0% |
| *# Red clover vein mosaic virus                                     | MT293134 | 8482 | 2,109   | 99%  | 56     | Red clover mosaic virus (YP_002647021.1)                         | 97.2% |
| <b>Order: None (Permutotetravirus-like)</b>                         |          |      |         |      |        |                                                                  |       |
| *Aphis glycines virus 2                                             | MW033624 | 4807 | 9,499   | 99%  | 9,499  | Aphis glycines virus 2 (YP_009179352.1)                          | 99.8% |
| Soybean thrips permutotetra-like virus 1                            | MT240780 | 4290 | 251,668 | 100% | 13,329 | Defiwi virus (AOC55067.1)                                        | 34.0% |
| Soybean thrips permutotetra-like virus 2                            | MW039362 | 1794 | 332     | 38%  | 16     | Vespa velutina associated (QGL51737.1)                           | 38.2% |
| Soybean thrips permutotetra-like virus 3                            | MW039363 | 1514 | 76      | 31%  | 3      | Hubei permutotetra-like virus 7 (YP_009337365.1)                 | 38.4% |
| <b>Order: Wolframvirales (Narnavirus-like)</b>                      |          |      |         |      |        |                                                                  |       |
| Soybean thrips narna-like virus 1                                   | MT293142 | 2785 | 5,400   | 97%  | 368    | Hubei narna-like virus 15 (YP_009337783.1)                       | 40.5% |
| Soybean thrips narna-like virus 2                                   | MT293143 | 2481 | 2,098   | 94%  | 175    | Barley aphid RNA virus 6 (BBV14771.1)                            | 34.4% |
| <b>Order: Cryppavirales (Mitovirus-like)</b>                        |          |      |         |      |        |                                                                  |       |
| Soybean thrips mito-like virus 1                                    | MT293144 | 2377 | 4,567   | 100% | 432    | Mitovirus sp. (QDH89786.1)                                       | 44.2% |
| Soybean thrips mito-like virus 2                                    | MT293145 | 2630 | 226     | 94%  | 17     | Plasmopara viticola associated mitovirus 56 (QIR30279.1)         | 46.2% |
| <b>Order: Ourlivirales (Ourmiavirus-like)</b>                       |          |      |         |      |        |                                                                  |       |
| Soybean thrips ourmia-like virus 1A                                 | MW039364 | 2237 | 214     | 96%  | 17     | Plasmopara viticola associated ourmia-like virus 72 (QGY72602.1) | 77.7% |
| Soybean thrips ourmia-like virus 1B                                 | MW039365 | 2174 | 170     | 93%  | 13     | Plasmopara viticola associated ourmia-like virus 72 (QGY72602.1) | 78.1% |
| Soybean thrips ourmia-like virus 2                                  | MW039366 | 1702 | 43      | 78%  | 0.6    | Plasmopara viticola associated ourmia-like virus 78 (QGY72608.1) | 62.9% |
| <b>Negative-stranded RNA viruses</b>                                |          |      |         |      |        |                                                                  |       |
| <b>Order: Articulavirales (Quarjavirus-like, Thogotovirus-like)</b> |          |      |         |      |        |                                                                  |       |
| Soybean thrips quaranja-like virus 1, segment 1                     | MW033634 | 2421 | 745     | 99%  | 76     | Old quarry swamp virus (AYP67574.1)                              | 34.6% |
| Soybean thrips quaranja-like virus 1, segment 2                     | MW033635 | 2345 | 408     | 96%  | 42     | Old quarry swamp virus (AYP67573.1)                              | 49.5% |
| Soybean thrips quaranja-like virus 1, segment 3                     | MW033636 | 2274 | 588     | 99%  | 64     | Old quarry swamp virus (AYP67572.1)                              | 26.6% |
| Soybean thrips quaranja-like virus 1, segment 5                     | MW033637 | 1813 | 302     | 100% | 42     | Old quarry swamp virus (AYP67576.1)                              | 27.5% |
| Soybean thrips quaranja-like virus 2, segment 2                     | MW033638 | 2434 | 429     | 99%  | 44     | Mason Creek virus (QFQ60710.1)                                   | 65.0% |
| Soybean thrips quaranja-like virus 2, segment 3                     | MW033639 | 2362 | 524     | 98%  | 54     | Mason Creek virus (QFQ60711.1)                                   | 52.5% |
| Soybean thrips quaranja-like virus 2, segment 4                     | MW033640 | 1608 | 228     | 98%  | 32     | Mason Creek virus (QFQ60713.1)                                   | 48.1% |
| Soybean thrips quaranja-like virus 3, segment 2                     | MW033641 | 2459 | 304     | 100% | 28     | Wuhan Mosquito Virus 7 (AJG39095.1)                              | 45.5% |
| Soybean thrips quaranja-like virus 4, segment 3                     | MW033642 | 2188 | 494     | 96%  | 46     | Old quarry swamp virus (AYP67572.1)                              | 36.8% |
| Soybean thrips thogotovirus 1, segment 1                            | MT195539 | 2413 | 12,438  | 100% | 1,179  | Hubei orthoptera virus 6 (APG77907.1)                            | 37.9% |
| Soybean thrips thogotovirus 1, segment 2                            | MT195540 | 2214 | 17,229  | 100% | 1,795  | Hubei orthoptera virus 6 (APG77906.1)                            | 53.6% |
| Soybean thrips thogotovirus 1, segment 3                            | MT195541 | 2014 | 34,764  | 100% | 4,041  | Hubei orthoptera virus 6 (APG77908.1)                            | 44.6% |
| Soybean thrips thogotovirus 1, segment 4                            | MT195542 | 1646 | 6,403   | 100% | 884    | Hubei orthoptera virus 6 (APG77909.1)                            | 33.3% |
| Soybean thrips thogotovirus 1, segment 5                            | MT195543 | 1588 | 22,071  | 100% | 3,147  | Hubei orthoptera virus 6 (APG77910.1)                            | 35.5% |
| Soybean thrips thogotovirus 2, segment 4                            | MW033633 | 1540 | 94      | 71%  | 10     | Dhori thogotovirus (YP_009352874.1)                              | 34.6% |

**Order: *Bunyavirales* (Bunyavirus-like)**

|                                                           |          |      |         |      |       |                                                |        |
|-----------------------------------------------------------|----------|------|---------|------|-------|------------------------------------------------|--------|
| Soybean thrips bunya-like virus 1                         | MT224143 | 9159 | 10,758  | 100% | 266   | Bronnoya virus (ASY03250.1)                    | 29.2%  |
| Soybean thrips bunya-like virus 2                         | MW033651 | 2917 | 193     | 42%  | 6     | Hubei bunya-like virus 8 (APG79291.1)          | 43.5%  |
| Soybean thrips bunya-like virus 3                         | MT224145 | 6585 | 961     | 100% | 33    | Ganda bee virus (YP_009666981.1)               | 46.9%  |
| Soybean thrips bunya-like virus 4                         | MT293149 | 4329 | 15,588  | 94%  | 775   | Geran virus (AKC89341.1)                       | 27.9%  |
| Soybean thrips bunya-like virus 5                         | MW023862 | 4684 | 4,560   | 100% | 218   | Ixodes scapularis (BBD75426.1)                 | 24.7%  |
| Soybean thrips bunya-like virus 6                         | MW033651 | 2562 | 99      | 38%  | 3     | Wuhan insect virus 16 (APG79216.1)             | 63.8%  |
| Soybean thrips bunya-like virus 7                         | MW033652 | 1469 | 55      | 23%  | 2     | Cumuto virus (YP_0096664615.1)                 | 36.3%  |
| Soybean thrips bunya-like virus 8                         | MW033653 | 1538 | 59      | 47%  | 4     | Yichang Insect virus (YP_009305144.1)          | 29.1%  |
| Soybean thrips bunya-like virus 9                         | MW033654 | 2451 | 9,058   | 66%  | 554   | Norway nairovirus 1 (ASY03237.1)               | 27.5%  |
| Soybean thrips bunya-like virus 9                         | MW033655 | 1538 | 174     | 28%  | 5     | South Bay virus (ANT80543.1)                   | 27.8%  |
| Soybean thrips negative-stranded RNA virus 2, segment L   | MT224152 | 9002 | 4,151   | 91%  | 92    | Hubei myriapoda virus 5 (YP_009345128.1)       | 33.8%  |
| Soybean thrips negative-stranded RNA virus 2, segment S   | MW033657 | 2426 | 1,944   | 94%  | 169   | Hubei myriapoda virus 5 (YP_009345127.1)       | 23.7%  |
| + Soybean thrips associated tenui-like virus 1, segment 1 | MT224144 | 8381 | 28,519  | 93%  | 746   | Rice stripe tenuivirus (ACG58336.1)            | 29.7%  |
| + Soybean thrips associated tenui-like virus 1, segment 4 | MW033650 | 2421 | 4,885   | 100% | 459   | Rice hoja blanca tenuivirus (YP_009449444.1)   | 27.1%  |
| + Soybean thrips associated orthospovirus 1, segment L    | MT195544 | 8917 | 31,857  | 100% | 818   | Capsicum chlorosis virus (AJD14704.1)          | 32.0%  |
| + Soybean thrips associated orthospovirus 1, segment M    | MT195545 | 4965 | 24,362  | 100% | 1,180 | Calla lily chlorotic spot virus (ACOS2398.1)   | 29.9%  |
| *+ Soybean vein necrosis orthospovirus, segment L         | MT293138 | 9038 | 130,169 | 100% | 3,273 | Soybean vein necrosis virus (ADX01591.1)       | 99.5%  |
| *+ Soybean vein necrosis orthospovirus, segment M         | MT293139 | 4941 | 49,083  | 100% | 2,259 | Soybean vein necrosis virus (AMB72701.1)       | 98.7%  |
| *+ Soybean vein necrosis orthospovirus, segment S         | MT293140 | 2622 | 24,466  | 100% | 2,150 | Soybean vein necrosis virus (AMB72703.1)       | 100.0% |
| *+ Tomato spotted wilt orthospovirus, segment S           | MW033649 | 1575 | 2,026   | 52%  | 59    | Tomato spotted wilt orthospovirus (APG79521.1) | 98.7%  |

**Order: *Jingchuvirales* (Chuvirus-like)**

|                                            |          |      |       |      |     |                                                             |       |
|--------------------------------------------|----------|------|-------|------|-----|-------------------------------------------------------------|-------|
| Soybean thrips chu-like virus 1, Segment L | MT224150 | 7386 | 5,064 | 100% | 104 | Hubei chuvirus-like virus 1 (YP_009337904.1)                | 33.3% |
| Soybean thrips chu-like virus 1, Segment S | MT293148 | 2272 | 96    | 57%  | 5   | Hubei chuvirus-like virus 1 (YP_009337905.1)                | 32.4% |
| Soybean thrips chu-like virus 2            | MT293147 | 4327 | 967   | 90%  | 44  | Wuchang Cockroach Virus 3 (YP_009666257.1)                  | 31.6% |
| Soybean thrips chu-like virus 3            | MT293151 | 2020 | 1,279 | 57%  | 23  | Imjin River virus 1 (YP_009182178.1)                        | 28.6% |
| Soybean thrips chu-like virus 4            | MW033643 | 2603 | 340   | 23%  | 7   | Hubei chuvirus-like virus 3 (YP_009337090.1)                | 31.3% |
| Soybean thrips chu-like virus 5            | MW033644 | 2369 | 362   | 22%  | 7   | Guangdong red-banded snake chuvirus-like virus (AVM87273.1) | 28.6% |
| Soybean thrips chu-like virus 6            | MW033645 | 1501 | 163   | 43%  | 8   | Wuchang Cockroach Virus 3 (YP_009666257.1)                  | 28.9% |
| Soybean thrips chu-like virus 7            | MW033646 | 1275 | 65    | 11%  | 1   | Blacklegged tick chuvirus-2 (AUW34383.1)                    | 44.0% |
| Soybean thrips chu-like virus 8            | MW033647 | 1755 | 55    | 44%  | 3   | Hubei chuvirus-like virus 1 (YP_009337905.1)                | 30.4% |

**Order: *Serpentovirales***

|                                              |          |      |       |      |     |                                                                         |       |
|----------------------------------------------|----------|------|-------|------|-----|-------------------------------------------------------------------------|-------|
| Soybean thrips negative-stranded RNA virus 1 | MT224151 | 8927 | 5,517 | 100% | 146 | Cladosporium cladosporioides negative-stranded RNA virus 1 (QDB75017.1) | 29.7% |
| Soybean thrips negative-stranded RNA virus 3 | MT224153 | 8937 | 6,342 | 100% | 169 | Cladosporium cladosporioides negative-stranded RNA virus 1 (QDB75017.1) | 28.4% |
| Soybean thrips negative-stranded RNA virus 6 | MT293150 | 4807 | 375   | 62%  | 11  | Cladosporium cladosporioides negative-stranded RNA virus 1 (QDB75017.1) | 30.6% |
| Soybean thrips negative-stranded RNA virus 7 | MW039378 | 8923 | 3,159 | 100% | 84  | Cladosporium cladosporioides negative-stranded RNA virus 1 (QDB75017.1) | 28.8% |
| Soybean thrips negative-stranded RNA virus 8 | MW039379 | 2111 | 197   | 29%  | 6   | Rhizoctonia solani negative-stranded virus 2 (ALD89130.1)               | 29.0% |

**Order: *Mononegavirales* (Rhabdovirus-like)**

|                                              |          |       |        |      |     |                                                      |       |
|----------------------------------------------|----------|-------|--------|------|-----|------------------------------------------------------|-------|
| Soybean thrips rhabdo-like virus 1           | MT224147 | 10848 | 26,478 | 97%  | 556 | Vesicular stomatitis Indiana virus (AYK03298.1)      | 33.0% |
| Soybean thrips rhabdo-like virus 2           | MT224148 | 10807 | 19,259 | 97%  | 404 | Vesicular stomatitis Indiana virus (AMK37545.1)      | 35.0% |
| Soybean thrips rhabdo-like virus 3           | MW023861 | 12697 | 20,399 | 100% | 368 | Wuhan ant virus (YP_009304559.1)                     | 32.8% |
| Soybean thrips negative-stranded RNA virus 4 | MT224149 | 7486  | 1,350  | 60%  | 25  | Hubei diptera virus 11 (YP_009337182.1)              | 39.5% |
| Soybean thrips negative-stranded RNA virus 5 | MW033648 | 2500  | 443    | 20%  | 8   | Gudgenby Calliphora mononega-like virus (QIJ70030.1) | 32.1% |

**Double-stranded RNA viruses****Order: *Durnavirales* (Partitivirus-like)**

|                                                    |          |      |        |      |       |                                                      |       |
|----------------------------------------------------|----------|------|--------|------|-------|------------------------------------------------------|-------|
| Soybean thrips partiti-like virus 1                | MT648422 | 1930 | 141    | 83%  | 15    | Grapevine partitivirus (AFX73019.1)                  | 52.2% |
| Soybean thrips partiti-like virus 2                | MT648423 | 1520 | 1,202  | 100% | 182   | Hubei partiti-like virus 32 (APG78251.1)             | 56.3% |
| Soybean thrips partiti-like virus 3                | MW039371 | 1523 | 37     | 64%  | 4     | Rosellinia necatrix partitivirus (BBU59840.1)        | 53.6% |
| Soybean thrips partiti-like virus 4                | MT648424 | 1470 | 476    | 100% | 77    | Hubei partiti-like virus 42 (APG78281.1)             | 56.7% |
| Soybean thrips partiti-like virus 5                | MT648425 | 1375 | 3,267  | 98%  | 539   | Hubei partiti-like virus 48 (APG78218.1)             | 53.0% |
| Soybean thrips partiti-like virus 6                | MT648426 | 1377 | 2,504  | 100% | 427   | Osugoroshi virus 3 (BBE15518.1)                      | 30.5% |
| Soybean thrips partiti-like virus 7                | MT648427 | 1429 | 1,063  | 100% | 174   | Hubei partiti-like virus 48 (APG78218.1)             | 53.4% |
| Soybean thrips partiti-like virus 8                | MT648428 | 2241 | 348    | 97%  | 17    | Hubei partiti-like virus 23 (APG78232.1)             | 47.4% |
| Soybean thrips partiti-like virus 9                | MT648429 | 1714 | 68,113 | 98%  | 9,128 | Hubei diptera virus 18 (YP_009329892.1)              | 63.4% |
| Soybean thrips partiti-like virus 10               | MT648430 | 1710 | 88     | 88%  | 11    | Hubei partiti-like virus 17 (APG78256.1)             | 80.8% |
| Soybean thrips partiti-like virus 11, segment 1    | MW023858 | 1613 | 546    | 90%  | 71    | Hubei tetragnatha maxillosa virus 8 (YP_009337885.1) | 57.6% |
| Soybean thrips partiti-like virus 11, segment 2    | MW023859 | 1541 | 382    | 93%  | 50    | Hubei tetragnatha maxillosa virus 8 (YP_009337888.1) | 34.3% |
| Soybean thrips partiti-like virus 11, segment 3    | MW023860 | 1482 | 366    | 92%  | 53    | Hubei tetragnatha maxillosa virus 8 (YP_009337886.1) | 28.4% |
| *Wuhan fly virus 5                                 | MW039370 | 1617 | 461    | 97%  | 63    | Wuhan fly virus 5 (YP_009342459.1)                   | 93.9% |
| <b>Order: Ghabrivirales (Totivirus-like)</b>       |          |      |        |      |       |                                                      |       |
| Soybean thrips-associated totivirus 1              | MT293124 | 5662 | 1,281  | 100% | 51    | Umbelopsis ramanniana virus 2 (VFI65724.1)           | 44.6% |
| Soybean thrips-associated totivirus 2              | MT293125 | 6778 | 4,164  | 88%  | 127   | Hubei diptera virus 22 (YP_009336825.1)              | 37.2% |
| Soybean thrips-associated dsRNA virus 1            | MT293146 | 3695 | 5,296  | 46%  | 149   | Circulifer tenellus virus 1 (YP_003800003.1)         | 44.8% |
| Soybean thrips-associated dsRNA virus 2            | MW039372 | 1479 | 51     | 19%  | 2     | Scaphoideus titanus toti-like virus (QIJ56904.1)     | 31.4% |
| Soybean thrips-associated dsRNA virus 4            | MW033658 | 3037 | 537    | 38%  | 14    | Spissistilus festinus virus 1 (YP_003800000.1)       | 25.9% |
| <b>Order: Reovirales (Reovirus-like)</b>           |          |      |        |      |       |                                                      |       |
| Soybean thrips-associated dsRNA virus 3, segment 1 | MT648431 | 2410 | 228    | 58%  | 13    | Shelly beach virus (AYP67577.1)                      | 39.1% |
| Soybean thrips-associated dsRNA virus 3, segment 1 | MW039372 | 1450 | 72     | 35%  | 4     | Shelly beach virus (AYP67577.1)                      | 42.2% |
| Soybean thrips-associated dsRNA virus 3, segment 4 | MW039373 | 2471 | 179    | 69%  | 12    | Shelly beach virus (AYP67580.1)                      | 30.0% |
| <b>Single-stranded DNA viruses</b>                 |          |      |        |      |       |                                                      |       |
| <b>Order: Piccovirales (Densovirus-like)</b>       |          |      |        |      |       |                                                      |       |
| Soybean thrips denso-like virus 1                  | MT240783 | 3829 | 788    | 97%  | 37    | Aedes albopictus densovirus (AYH52678.1)             | 36.9% |
| Soybean thrips denso-like virus 2                  | MW039377 | 3403 | 188    | 68%  | 5     | Viltain virus (AQN78648.1)                           | 38.6% |

\* previously described viruses detected in this study.

# plant viruses detected in this study.

+ viruses that infect plants and thrips.
